# Supplementary material for: A theoretical study on the electronic structures and photophysical properties of phosphorescent Iridium(iii) complexes with –CH3/H and t-Bu substituents
Source: Royal Society of Chemistry journal article supplement (doi:10.1039/c6dt02198k), 2016-01-01
Supplement: c6dt02198k1.pdf [file c6dt02198k1.pdf]

Theoretical study on the electronic structures and photophysical properties of phosphorescent iridium(III) complexes with -CH<sub>3</sub>/H and tBu substituents

Yanling Si<sup>\*a</sup>, Nan Qu<sup>a</sup>, Liying Cui<sup>a</sup>, Bo Gao<sup>a</sup> and Zhijian Wu<sup>\*b</sup>

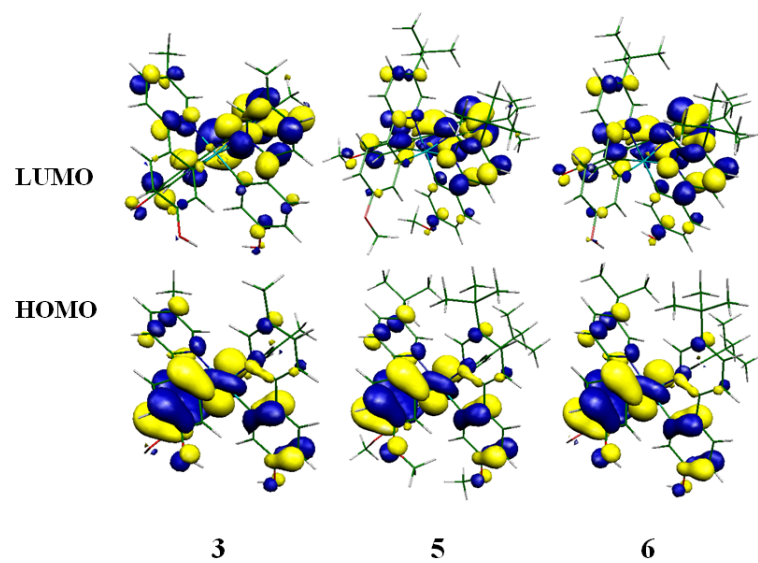

Fig. S1 Orbital composition distribution of HOMO and LUMO for complexes **3**, **5** and **6**.

Table S1 Main optimized bond lengths of the complex **1** at the PBE0, B3LYP, Cam-B3LYP, M062X and M052X level, respectively, together with the experimental values.

| Item          | PBE0  | B3LYP | Cam-b3LYP | M062X | M052X | Exp. <sup>19</sup> |
|---------------|-------|-------|-----------|-------|-------|--------------------|
| Bond length/Å |       |       |           |       |       |                    |
| Ir-N1         | 2.152 | 2.190 | 2.171     | 2.199 | 2.177 | 2.135              |
| Ir-C1         | 2.012 | 2.026 | 2.022     | 1.997 | 2.006 | 2.021              |
| Ir-N2         | 2.150 | 2.189 | 2.169     | 2.192 | 2.178 | 2.139              |
| Ir-C2         | 2.007 | 2.025 | 2.019     | 1.997 | 2.002 | 2.003              |
| Ir-N3         | 2.149 | 2.191 | 2.169     | 2.201 | 2.182 | 2.126              |
| Ir-C3         | 2.007 | 2.028 | 2.018     | 1.996 | 2.001 | 2.004              |

Table S2 Calculated wavelength (nm)/energies (eV), largest oscillator strength ( $f$ ) and dominant orbital excitations of the singlet vertical absorptions for **1-6**

|          | State           | $\lambda_{\text{cal}}$ | $f$    | Configuration   | Character      | Exp. <sup>19</sup> |
|----------|-----------------|------------------------|--------|-----------------|----------------|--------------------|
| <b>1</b> | S <sub>25</sub> | 287                    | 0.3163 | H-2->L+5 (46%)  | MLCT/LLCT/ILCT | 291                |
|          |                 |                        |        | H-5->LUMO (28%) | ILCT/LLCT      |                    |
| <b>2</b> | S <sub>28</sub> | 286                    | 0.2237 | H-5->L+2 (42%)  | MLCT/LLCT/ILCT |                    |
|          |                 |                        |        | H-2->L+5 (19%)  | MLCT/LLCT      |                    |
| <b>3</b> | S <sub>27</sub> | 285                    | 0.2877 | H-5->LUMO (30%) | MLCT/LLCT/ILCT |                    |
|          |                 |                        |        | H-5->L+2 (24%)  | LLCT/ILCT      |                    |
|          |                 |                        |        | H-2->L+5 (17%)  | MLCT/LLCT/ILCT |                    |
| <b>4</b> | S <sub>23</sub> | 293                    | 0.3023 | H-4->L+1 (39%)  | MLCT/LLCT/ILCT |                    |
|          |                 |                        |        | H-2->L+5 (21%)  | LLCT/ILCT      |                    |
| <b>5</b> | S <sub>25</sub> | 287                    | 0.2415 | H-5->LUMO (67%) | MLCT/LLCT/ILCT |                    |
| <b>6</b> | S <sub>27</sub> | 286                    | 0.2840 | H-5->LUMO (63%) | MLCT/LLCT/ILCT |                    |
|          |                 |                        |        | H-5->L+1 (12%)  | MLCT/ILCT/LLCT |                    |

Table S3 Molecular orbital composition (%) of **1** in the ground state

| MO   | Energy(ev) | Composition (100%) |    |    |    | Assign                |
|------|------------|--------------------|----|----|----|-----------------------|
|      |            | Ir                 | L3 | L2 | L1 |                       |
| L+5  | -0.43      | 2                  | 3  | 50 | 45 | $\pi^*(L1+L2)$        |
| L+4  | -0.48      | 2                  | 51 | 23 | 25 | $\pi^*(L3+L2+L1)$     |
| L+3  | -0.74      | 2                  | 44 | 25 | 28 | $\pi^*(L3+L2+L1)$     |
| L+2  | -0.99      | 5                  | 11 | 51 | 34 | $\pi^*(L2+L1+L3)$     |
| L+1  | -1.03      | 4                  | 24 | 35 | 37 | $\pi^*(L1+L2+L3)$     |
| LUMO | -1.13      | 2                  | 62 | 11 | 25 | $\pi^*(L3+L1+L2)$     |
| HOMO | -5.17      | 38                 | 12 | 30 | 20 | $d(Ir)+\pi(L2+L1+L3)$ |
| H-1  | -5.31      | 26                 | 5  | 33 | 36 | $d(Ir)+\pi(L1+L2)$    |
| H-2  | -5.37      | 39                 | 41 | 7  | 13 | $d(Ir)+\pi(L3+L1)$    |
| H-3  | -5.64      | 17                 | 5  | 19 | 60 | $d(Ir)+\pi(L1+L2)$    |
| H-4  | -5.72      | 16                 | 18 | 59 | 7  | $d(Ir)+\pi(L2+L3)$    |
| H-5  | -5.83      | 1                  | 76 | 3  | 19 | $\pi(L3+L1)$          |

Table S4 Molecular orbital composition (%) of **2** in the ground state

| MO   | Energy(ev) | Composition (100%) |    |    |    | Assign                |
|------|------------|--------------------|----|----|----|-----------------------|
|      |            | Ir                 | L3 | L2 | L1 |                       |
| L+5  | -0.19      | 2                  | 2  | 31 | 65 | $\pi^*(L1+L2)$        |
| L+4  | -0.24      | 2                  | 47 | 40 | 11 | $\pi^*(L3+L2)$        |
| L+3  | -0.5       | 3                  | 49 | 27 | 22 | $\pi^*(L3+L2+L1)$     |
| L+2  | -0.73      | 5                  | 1  | 19 | 76 | $\pi^*(L1+L2)$        |
| L+1  | -0.77      | 4                  | 25 | 60 | 11 | $\pi^*(L2+L3)$        |
| LUMO | -0.86      | 2                  | 71 | 18 | 9  | $\pi^*(L3+L2)$        |
| HOMO | -4.89      | 35                 | 7  | 20 | 37 | $d(Ir)+\pi(L1+L2)$    |
| H-1  | -5.03      | 25                 | 4  | 41 | 30 | $d(Ir)+\pi(L2+L1)$    |
| H-2  | -5.13      | 34                 | 49 | 9  | 8  | $d(Ir)+\pi(L3)$       |
| H-3  | -5.48      | 15                 | 62 | 19 | 4  | $d(Ir)+\pi(L3+L2)$    |
| H-4  | -5.51      | 22                 | 6  | 18 | 54 | $d(Ir)+\pi(L1+L2)$    |
| H-5  | -5.68      | 18                 | 21 | 42 | 19 | $d(Ir)+\pi(L2+L3+L1)$ |

Table S5 Molecular orbital composition (%) of **3** in the ground state

| MO   | Energy(ev) | Composition (100%) |    |    |    | Assign                       |
|------|------------|--------------------|----|----|----|------------------------------|
|      |            | Ir                 | L3 | L2 | L1 |                              |
| L+5  | -0.25      | 2                  | 66 | 3  | 30 | $\pi^*(L3+L1)$               |
| L+4  | -0.29      | 2                  | 8  | 51 | 39 | $\pi^*(L2+L1)$               |
| L+3  | -0.55      | 3                  | 24 | 44 | 30 | $\pi^*(L2+L1+L3)$            |
| L+2  | -0.79      | 5                  | 77 | 2  | 17 | $\pi^*(L3+L1)$               |
| L+1  | -0.82      | 4                  | 8  | 29 | 58 | $\pi^*(L1+L2)$               |
| LUMO | -0.9       | 2                  | 12 | 65 | 21 | $\pi^*(L2+L1+L3)$            |
| HOMO | -4.98      | 36                 | 35 | 10 | 19 | $d(\text{Ir})+\pi(L3+L1)$    |
| H-1  | -5.13      | 26                 | 32 | 5  | 37 | $d(\text{Ir})+\pi(L1+L3)$    |
| H-2  | -5.19      | 31                 | 8  | 48 | 13 | $d(\text{Ir})+\pi(L2+L1)$    |
| H-3  | -5.57      | 21                 | 57 | 13 | 10 | $d(\text{Ir})+\pi(L3+L2)$    |
| H-4  | -5.59      | 19                 | 4  | 42 | 35 | $d(\text{Ir})+\pi(L2+L1)$    |
| H-5  | -5.75      | 18                 | 17 | 30 | 35 | $d(\text{Ir})+\pi(L1+L2+L3)$ |

Table S6 Molecular orbital composition (%) of **4** in the ground state

| MO   | Energy(ev) | Composition (100%) |    |    |    | Assign                    |
|------|------------|--------------------|----|----|----|---------------------------|
|      |            | Ir                 | L3 | L2 | L1 |                           |
| L+5  | -0.51      | 2                  | 1  | 55 | 43 | $\pi^*(L2+L1)$            |
| L+4  | -0.56      | 2                  | 54 | 17 | 28 | $\pi^*(L3+L1+L2)$         |
| L+3  | -0.81      | 2                  | 44 | 26 | 28 | $\pi^*(L3+L1+L2)$         |
| L+2  | -0.91      | 4                  | 1  | 53 | 42 | $\pi^*(L2+L1)$            |
| L+1  | -0.96      | 4                  | 29 | 30 | 37 | $\pi^*(L1+L2+L3)$         |
| LUMO | -1.06      | 2                  | 67 | 14 | 17 | $\pi^*(L3+L1+L2)$         |
| HOMO | -5.16      | 38                 | 9  | 31 | 22 | $d(\text{Ir})+\pi(L2+L1)$ |
| H-1  | -5.27      | 26                 | 4  | 30 | 40 | $d(\text{Ir})+\pi(L1+L2)$ |
| H-2  | -5.34      | 38                 | 42 | 8  | 12 | $d(\text{Ir})+\pi(L3+L1)$ |
| H-3  | -5.61      | 16                 | 4  | 7  | 73 | $d(\text{Ir})+\pi(L1)$    |
| H-4  | -5.71      | 16                 | 5  | 72 | 6  | $d(\text{Ir})+\pi(L2)$    |
| H-5  | -5.84      | 1                  | 96 | 2  | 1  | $\pi(L3)$                 |

Table S7 Molecular orbital composition (%) of **5** in the ground state

| MO   | Energy(ev) | Composition (100%) |    |    |    | Assign                       |
|------|------------|--------------------|----|----|----|------------------------------|
|      |            | Ir                 | L3 | L2 | L1 |                              |
| L+5  | -0.28      | 1                  | 65 | 2  | 32 | $\pi^*(L3+L1)$               |
| L+4  | -0.33      | 1                  | 11 | 48 | 39 | $\pi^*(L2+L1)$               |
| L+3  | -0.59      | 2                  | 23 | 48 | 27 | $\pi^*(L2+L1+L3)$            |
| L+2  | -0.66      | 5                  | 71 | 1  | 23 | $\pi^*(L3+L1)$               |
| L+1  | -0.7       | 4                  | 14 | 28 | 54 | $\pi^*(L1+L2+L3)$            |
| LUMO | -0.8       | 2                  | 11 | 68 | 19 | $\pi^*(L2+L1)$               |
| HOMO | -4.89      | 34                 | 40 | 6  | 20 | $d(\text{Ir})+\pi(L3+L1)$    |
| H-1  | -5         | 25                 | 28 | 4  | 42 | $d(\text{Ir})+\pi(L1+L3)$    |
| H-2  | -5.11      | 34                 | 7  | 51 | 8  | $d(\text{Ir})+\pi(L2)$       |
| H-3  | -5.47      | 14                 | 4  | 64 | 18 | $d(\text{Ir})+\pi(L2+L3)$    |
| H-4  | -5.5       | 22                 | 54 | 5  | 19 | $d(\text{Ir})+\pi(L3+L1)$    |
| H-5  | -5.66      | 19                 | 19 | 20 | 42 | $d(\text{Ir})+\pi(L1+L2+L3)$ |

Table S8 Molecular orbital composition (%) of **6** in the ground state

| MO   | Energy(ev) | Composition (100%) |    |    |    | Assign                       |
|------|------------|--------------------|----|----|----|------------------------------|
|      |            | Ir                 | L3 | L2 | L1 |                              |
| L+5  | -0.33      | 1                  | 64 | 2  | 32 | $\pi^*(L3+L1)$               |
| L+4  | -0.38      | 1                  | 9  | 53 | 36 | $\pi^*(L2+L1)$               |
| L+3  | -0.64      | 2                  | 25 | 43 | 30 | $\pi^*(L2+L1+L3)$            |
| L+2  | -0.71      | 4                  | 74 | 2  | 19 | $\pi^*(L3+L1)$               |
| L+1  | -0.75      | 4                  | 9  | 33 | 54 | $\pi^*(L1+L2)$               |
| LUMO | -0.83      | 2                  | 13 | 62 | 23 | $\pi^*(L2+L1+L3)$            |
| HOMO | -4.98      | 35                 | 37 | 9  | 19 | $d(\text{Ir})+\pi(L3+L1)$    |
| H-1  | -5.1       | 26                 | 30 | 5  | 39 | $d(\text{Ir})+\pi(L1+L3)$    |
| H-2  | -5.17      | 31                 | 7  | 50 | 12 | $\pi(L2+L1)$                 |
| H-3  | -5.56      | 20                 | 58 | 12 | 10 | $d(\text{Ir})+\pi(L3+L2)$    |
| H-4  | -5.58      | 18                 | 3  | 43 | 35 | $d(\text{Ir})+\pi(L2+L1)$    |
| H-5  | -5.73      | 19                 | 17 | 30 | 35 | $d(\text{Ir})+\pi(L1+L2+L3)$ |

Table S9 Cartesian coordinates for the optimized structures of **1** in the ground state

|   |             |             |             |    |             |             |             |
|---|-------------|-------------|-------------|----|-------------|-------------|-------------|
| C | 3.22557400  | -1.51902400 | -2.25218700 | H  | 1.87034800  | 2.52747200  | 4.30823400  |
| H | 3.40824300  | -2.21067600 | -1.43420000 | C  | -3.11672400 | 0.02146900  | 3.55234400  |
| C | 3.78657400  | -1.73364700 | -3.50430800 | C  | -3.49944100 | 0.82257800  | 2.47628800  |
| C | 3.48550200  | -0.78695800 | -4.49129000 | H  | -2.81691100 | 1.56552500  | 2.07644200  |
| H | 3.89552000  | -0.89832700 | -5.49281500 | C  | -4.76724800 | 0.66157800  | 1.92504400  |
| C | 2.66104300  | 0.28392500  | -4.20010700 | H  | -5.05968600 | 1.29224100  | 1.08999600  |
| H | 2.42235100  | 1.00940600  | -4.96998300 | C  | -5.65365100 | -0.28236800 | 2.44057500  |
| C | 2.12496600  | 0.43171100  | -2.91326600 | H  | -6.64308900 | -0.39559800 | 2.00653100  |
| C | 4.65897200  | -2.92369800 | -3.77609800 | C  | -5.25990700 | -1.07613800 | 3.51635800  |
| H | 4.78187800  | -3.53894400 | -2.87957500 | H  | -5.94153300 | -1.81519400 | 3.92995700  |
| H | 5.65702000  | -2.62054400 | -4.11444600 | C  | -3.99355400 | -0.93005900 | 4.07219900  |
| H | 4.23008700  | -3.55977200 | -4.55946100 | H  | -3.66817900 | -1.53494900 | 4.91307500  |
| C | 1.22172000  | 1.49241800  | -2.47799300 | C  | 3.41035200  | -1.96170700 | 1.62501100  |
| C | 0.79064400  | 1.42523600  | -1.12332900 | H  | 4.01585600  | -1.05990000 | 1.65615700  |
| C | -0.12420600 | 2.40171300  | -0.70522900 | C  | 3.82153400  | -3.11743400 | 2.27530800  |
| H | -0.49821300 | 2.40080700  | 0.31439800  | C  | 2.96315100  | -4.22047600 | 2.18333400  |
| C | -0.58521700 | 3.37770500  | -1.58008600 | H  | 3.22696000  | -5.15494700 | 2.67409000  |
| C | -0.14201600 | 3.44721200  | -2.90057400 | C  | 1.77837200  | -4.12450400 | 1.47821300  |
| H | -0.51659100 | 4.22934900  | -3.55294500 | H  | 1.11247500  | -4.97831500 | 1.41776900  |
| C | 0.76631000  | 2.49864700  | -3.34121800 | C  | 1.42885000  | -2.92294800 | 0.84448500  |
| H | 1.10608700  | 2.54213900  | -4.37319400 | C  | 5.11015500  | -3.16669900 | 3.04235000  |
| C | -2.79810300 | 4.02471100  | -1.05264000 | H  | 5.66169000  | -2.22579500 | 2.95253400  |
| C | -3.34474700 | 2.83394900  | -1.53208000 | H  | 5.76071200  | -3.97269000 | 2.68256200  |
| H | -2.70815100 | 2.08250300  | -1.98684700 | H  | 4.93140300  | -3.34598300 | 4.10936300  |
| C | -4.71824800 | 2.62234500  | -1.42475800 | C  | 0.21678900  | -2.68283300 | 0.07273600  |
| H | -5.13656100 | 1.69257000  | -1.80250500 | C  | 0.06359400  | -1.37108100 | -0.45736900 |
| C | -5.54653800 | 3.57967000  | -0.84528000 | C  | -1.09821600 | -1.12075900 | -1.19673000 |
| H | -6.61619200 | 3.40701300  | -0.76802700 | H  | -1.27939600 | -0.14016400 | -1.62538700 |
| C | -4.98641600 | 4.76459100  | -0.36722800 | C  | -2.05841400 | -2.10600000 | -1.39811400 |
| H | -5.61893900 | 5.52123100  | 0.08974400  | C  | -1.90059100 | -3.39299000 | -0.87251000 |
| C | -3.62010600 | 4.99106500  | -0.46796800 | H  | -2.65380500 | -4.15467100 | -1.04519300 |
| H | -3.16706100 | 5.90726800  | -0.10156100 | C  | -0.75874000 | -3.66725200 | -0.13982200 |
| C | 4.23558800  | 1.51523000  | -0.03153000 | H  | -0.63332100 | -4.66907400 | 0.26436700  |
| H | 4.34666100  | 1.01938000  | -0.99195600 | C  | -4.37117800 | -2.27427700 | -1.92174200 |
| C | 5.20581600  | 2.39472700  | 0.42948300  | C  | -5.15599200 | -2.65369800 | -3.00885000 |
| C | 4.96473400  | 2.98837700  | 1.67502800  | H  | -4.73324600 | -2.58993000 | -4.00690600 |
| H | 5.68501700  | 3.69053200  | 2.08956400  | C  | -6.45661100 | -3.09969200 | -2.79494800 |
| C | 3.81123300  | 2.69192100  | 2.37576300  | H  | -7.06678200 | -3.39469400 | -3.64462500 |
| H | 3.62367000  | 3.16219100  | 3.33473300  | C  | -6.97225600 | -3.17495700 | -1.50302400 |
| C | 2.87460000  | 1.79190200  | 1.84629800  | H  | -7.98621700 | -3.52817900 | -1.33791300 |
| C | 6.43519000  | 2.69577200  | -0.37627900 | C  | -6.17873100 | -2.78836600 | -0.42457000 |
| H | 6.45988300  | 2.10701300  | -1.29844700 | H  | -6.57195300 | -2.82963100 | 0.58778600  |
| H | 7.34896400  | 2.47399000  | 0.18780500  | C  | -4.87956800 | -2.33194200 | -0.62373600 |
| H | 6.47664600  | 3.75493100  | -0.65742100 | H  | -4.26938000 | -2.01094900 | 0.21480300  |
| C | 1.61969300  | 1.39791100  | 2.47305600  | Ir | 1.54852500  | -0.08612300 | -0.04115200 |
| C | 0.79372200  | 0.51207500  | 1.72521200  | N  | 2.43555300  | -0.47876600 | -1.95860600 |
| C | -0.42061800 | 0.12754700  | 2.30991300  | N  | 3.11812600  | 1.21682000  | 0.64318000  |

|   |             |             |            |   |             |             |             |
|---|-------------|-------------|------------|---|-------------|-------------|-------------|
| H | -1.08474600 | -0.54973300 | 1.78156700 | N | 2.26896100  | -1.86202600 | 0.93246200  |
| C | -0.79137200 | 0.59164200  | 3.57029600 | O | -1.46998400 | 4.34008100  | -1.13336400 |
| C | 0.03093500  | 1.45571200  | 4.29718100 | O | -1.92749900 | 0.17027400  | 4.21519100  |
| H | -0.28810200 | 1.79281500  | 5.27795400 | O | -3.12494900 | -1.77315300 | -2.19736100 |
| C | 1.23298800  | 1.85315500  | 3.74133800 | H | 1.87034800  | 2.52747200  | 4.30823400  |

Table S10 Cartesian coordinates for the optimized structures of **2** in the ground state

|   |             |             |             |    |             |             |             |
|---|-------------|-------------|-------------|----|-------------|-------------|-------------|
| C | -1.87333800 | -2.35392300 | 1.35406300  | H  | -0.51936700 | 4.04224600  | -3.01574400 |
| H | -1.96848100 | -2.67890400 | 0.32127400  | C  | -1.83364200 | -1.26854100 | -2.41338700 |
| C | -2.43871700 | -3.09233100 | 2.38450000  | H  | -2.50416200 | -0.44716900 | -2.17595500 |
| C | -2.25132000 | -2.59390700 | 3.68067800  | C  | -2.10882900 | -2.13000700 | -3.46697100 |
| H | -2.66839600 | -3.12817500 | 4.53192900  | C  | -1.17736000 | -3.15153400 | -3.69347000 |
| C | -1.53235800 | -1.43203700 | 3.88321200  | H  | -1.33603800 | -3.85938300 | -4.50442100 |
| H | -1.38128700 | -1.05558800 | 4.88902400  | C  | -0.05417700 | -3.25875200 | -2.89579300 |
| C | -0.98709800 | -0.73759300 | 2.79142000  | H  | 0.66821300  | -4.04643500 | -3.08070300 |
| C | -3.19889100 | -4.35776100 | 2.11516100  | C  | 0.16008900  | -2.34791900 | -1.85011900 |
| H | -3.24348300 | -4.57302300 | 1.04299300  | C  | -3.33358700 | -1.95964900 | -4.31684200 |
| H | -4.22889100 | -4.29519500 | 2.48682200  | H  | -3.95564300 | -1.13499700 | -3.95541000 |
| H | -2.72888400 | -5.21794300 | 2.60699700  | H  | -3.94932800 | -2.86708400 | -4.32123700 |
| C | -0.20462300 | 0.48482900  | 2.86207100  | H  | -3.06835800 | -1.74279000 | -5.35868800 |
| C | 0.27709800  | 0.99383700  | 1.62641500  | C  | 1.30202700  | -2.33588500 | -0.94727600 |
| C | 1.04761400  | 2.16531500  | 1.66881500  | C  | 1.32406200  | -1.29477700 | 0.02856000  |
| H | 1.42773300  | 2.56907900  | 0.73717500  | C  | 2.42496100  | -1.25766100 | 0.88577700  |
| C | 1.33026700  | 2.80583800  | 2.87521000  | H  | 2.50525900  | -0.48738200 | 1.64750000  |
| C | 0.84456400  | 2.29028900  | 4.08772800  | C  | 3.46105100  | -2.19278600 | 0.80059100  |
| H | 1.07945800  | 2.80975500  | 5.01130200  | C  | 3.42485500  | -3.21152900 | -0.16090200 |
| C | 0.08493600  | 1.13956800  | 4.07119700  | H  | 4.21761000  | -3.94701100 | -0.23919000 |
| H | -0.28417000 | 0.74773500  | 5.01639700  | C  | 2.34053700  | -3.26894000 | -1.02446600 |
| C | -3.07970700 | 1.24377000  | 0.32933300  | H  | 2.31954900  | -4.06103800 | -1.76971800 |
| H | -3.19562800 | 0.41645800  | 1.02448600  | Ir | -0.25143300 | -0.05022800 | -0.00539800 |
| C | -4.10705200 | 2.15689500  | 0.13351800  | N  | -1.18353100 | -1.22127200 | 1.53863400  |
| C | -3.85345400 | 3.18994100  | -0.77826800 | N  | -1.89764900 | 1.30542000  | -0.29608800 |
| H | -4.61830900 | 3.93828400  | -0.97580300 | N  | -0.75333700 | -1.37009700 | -1.62934300 |
| C | -2.63304300 | 3.26840000  | -1.42122500 | O  | 2.06902700  | 3.93797800  | 2.98385900  |
| H | -2.43819200 | 4.07623500  | -2.11825200 | O  | 3.52427800  | 2.19374400  | -3.31322900 |
| C | -1.63806300 | 2.31089500  | -1.16974700 | O  | 4.47123600  | -2.03449200 | 1.69395700  |
| C | -5.40868100 | 2.04036400  | 0.87081100  | C  | 5.53348200  | -2.95420800 | 1.66135200  |
| H | -5.42066600 | 1.15693100  | 1.51670900  | H  | 6.22174900  | -2.65059800 | 2.45267300  |
| H | -6.25689100 | 1.96199000  | 0.18001000  | H  | 5.19055200  | -3.97946400 | 1.85685200  |
| H | -5.58717300 | 2.91715300  | 1.50492300  | H  | 6.06166900  | -2.93308300 | 0.69809400  |
| C | -0.30825500 | 2.28483100  | -1.75748300 | C  | 2.59164500  | 4.49640800  | 1.80080200  |
| C | 0.54824100  | 1.23735900  | -1.32356100 | H  | 3.27006800  | 3.80048000  | 1.29066800  |
| C | 1.84781300  | 1.20863300  | -1.85195400 | H  | 1.79503400  | 4.78799200  | 1.10420400  |
| H | 2.52074000  | 0.42446900  | -1.52424000 | H  | 3.14767100  | 5.38463800  | 2.10764700  |
| C | 2.28170900  | 2.16529700  | -2.76936000 | C  | 4.43382000  | 1.19106400  | -2.92297900 |
| C | 1.42005800  | 3.19046700  | -3.19218300 | H  | 4.63416000  | 1.22384400  | -1.84416800 |
| H | 1.78289400  | 3.92018100  | -3.90913900 | H  | 4.06868100  | 0.18931400  | -3.18401000 |
| C | 0.13847600  | 3.24172000  | -2.68443700 | H  | 5.35730800  | 1.39399400  | -3.46919900 |



Table S11 Cartesian coordinates for the optimized structures of **3** in the ground state

|   |             |             |             |    |             |             |             |
|---|-------------|-------------|-------------|----|-------------|-------------|-------------|
| C | 0.43992000  | 3.04736300  | 0.40317100  | C  | 0.52765100  | -4.34460300 | 0.11931600  |
| H | 0.89280700  | 2.68955900  | 1.32408400  | C  | -0.65688800 | -4.76318800 | 0.73761000  |
| C | 0.39853800  | 4.40386300  | 0.11195500  | H  | -0.81932300 | -5.82083000 | 0.91856400  |
| C | -0.19730600 | 4.75910300  | -1.10570300 | C  | -1.58767500 | -3.80806300 | 1.10129600  |
| H | -0.25824200 | 5.80664500  | -1.39375700 | H  | -2.50712900 | -4.13795900 | 1.57974100  |
| C | -0.69961200 | 3.78487900  | -1.94629900 | C  | 0.60995900  | 0.15468900  | 3.03794200  |
| H | -1.15046500 | 4.06432500  | -2.89226600 | H  | -0.47573100 | 0.14557600  | 3.08390900  |
| C | -0.62237600 | 2.43014200  | -1.58572500 | C  | 1.37066700  | 0.21292400  | 4.19786000  |
| C | 0.97247000  | 5.42398400  | 1.05077400  | C  | 2.76138100  | 0.21319000  | 4.02876300  |
| H | 1.37312800  | 4.95148100  | 1.95301800  | H  | 3.41299600  | 0.25680600  | 4.89905000  |
| H | 0.21563600  | 6.15375600  | 1.36298100  | C  | 3.30904700  | 0.15074600  | 2.76179600  |
| H | 1.78854700  | 5.98514800  | 0.57977200  | H  | 4.38648100  | 0.14302000  | 2.63715300  |
| C | -1.09986600 | 1.30736500  | -2.37586500 | C  | 2.47658300  | 0.09129500  | 1.63363800  |
| C | -0.88303600 | 0.01423000  | -1.82217100 | C  | 0.72832400  | 0.26261600  | 5.55295700  |
| C | -1.31872300 | -1.07828200 | -2.57829400 | H  | -0.36309100 | 0.27757400  | 5.47410300  |
| H | -1.16592500 | -2.08690000 | -2.19526600 | H  | 1.03618800  | 1.15493100  | 6.11124900  |
| C | -1.93815100 | -0.91401600 | -3.81673600 | H  | 1.00535000  | -0.60956600 | 6.15722600  |
| C | -2.14784800 | 0.36397800  | -4.34879800 | C  | 2.91643200  | 0.00886800  | 0.24892800  |
| H | -2.63228700 | 0.46651500  | -5.31442100 | C  | 1.88738300  | -0.07202900 | -0.73563200 |
| C | -1.72600000 | 1.46133700  | -3.62262300 | C  | 2.29102600  | -0.17594800 | -2.07032200 |
| H | -1.88814100 | 2.45192100  | -4.04148700 | H  | 1.55527500  | -0.24713000 | -2.86579700 |
| C | -2.73836000 | 0.89169300  | 1.15365200  | C  | 3.63942700  | -0.19547400 | -2.42538000 |
| H | -2.35234400 | 1.86634800  | 0.86690700  | C  | 4.63906000  | -0.11167000 | -1.44775500 |
| C | -3.99433100 | 0.76736600  | 1.73179600  | H  | 5.69051400  | -0.12500400 | -1.73047700 |
| C | -4.40146600 | -0.53303100 | 2.05760000  | C  | 4.26786700  | -0.00984300 | -0.11805400 |
| H | -5.37596300 | -0.69750500 | 2.51286300  | H  | 5.05001500  | 0.05276800  | 0.63518800  |
| C | -3.57462100 | -1.60852800 | 1.79543900  | Ir | 0.00994100  | -0.02074700 | -0.02410300 |
| H | -3.89871200 | -2.61396200 | 2.04115200  | N  | -0.05287200 | 2.09622100  | -0.39996000 |
| C | -2.31773400 | -1.40706800 | 1.20390200  | N  | -1.92593200 | -0.14301600 | 0.90444500  |
| C | -4.86396900 | 1.96496500  | 1.97882400  | N  | 1.13140000  | 0.10412800  | 1.80572600  |
| H | -4.35761200 | 2.88976900  | 1.68556300  | O  | -2.36121800 | -1.97089600 | -4.55574300 |
| H | -5.13609100 | 2.05286900  | 3.03756400  | O  | 1.41942000  | -5.30722400 | -0.22970600 |
| H | -5.79832800 | 1.90320900  | 1.40797300  | O  | 3.94112000  | -0.30143000 | -3.74599700 |
| C | -1.35837700 | -2.44476200 | 0.85970300  | H  | -2.14684400 | -2.78002200 | -4.06990900 |
| C | -0.15710400 | -2.00471400 | 0.23464800  | H  | 4.90300700  | -0.29192700 | -3.84338100 |
| C | 0.76636200  | -2.99248200 | -0.12412000 | H  | 2.18051700  | -4.87337100 | -0.64098200 |
| H | 1.69562100  | -2.70078800 | -0.61288500 | C  | 0.52765100  | -4.34460300 | 0.11931600  |

Table S12 Cartesian coordinates for the optimized structures of **4** in the ground state

|   |            |             |             |   |             |             |             |
|---|------------|-------------|-------------|---|-------------|-------------|-------------|
| C | 2.60352600 | -1.11774600 | -2.14024600 | C | -0.60272300 | -1.26157600 | -0.40455200 |
| H | 2.81785000 | -1.78938100 | -1.31450600 | C | -1.77953400 | -1.10597200 | -1.14659300 |
| C | 3.22742600 | -1.27492600 | -3.37693700 | H | -2.04480500 | -0.14002400 | -1.56463900 |
| C | 2.86367400 | -0.34902400 | -4.36002300 | C | -2.64790600 | -2.16977500 | -1.36512700 |
| H | 3.30306900 | -0.39727300 | -5.35133500 | C | -2.37944200 | -3.44414400 | -0.85414700 |
| C | 1.93142900 | 0.64025800  | -4.08648500 | H | -3.06229000 | -4.26670100 | -1.03956300 |
| H | 1.65301100 | 1.34644400  | -4.86116100 | C | -1.22023300 | -3.62576400 | -0.11994800 |
| C | 1.34524700 | 0.72884300  | -2.82051500 | H | -1.00749700 | -4.61702300 | 0.27370400  |
| C | 0.34115500 | 1.69992300  | -2.39706900 | C | -4.93696300 | -2.52798200 | -1.89286100 |

|   |             |             |             |    |             |             |             |
|---|-------------|-------------|-------------|----|-------------|-------------|-------------|
| C | -0.10076700 | 1.59170800  | -1.04857300 | C  | -5.68833400 | -2.96881000 | -2.98052900 |
| C | -1.09871400 | 2.48872200  | -0.64071200 | H  | -5.27294600 | -2.86828300 | -3.97866600 |
| H | -1.48218000 | 2.45674900  | 0.37489700  | C  | -6.94741300 | -3.52154900 | -2.76694000 |
| C | -1.62949700 | 3.42343300  | -1.52035600 | H  | -7.53143700 | -3.86445600 | -3.61702800 |
| C | -1.17995100 | 3.53064600  | -2.83648500 | C  | -7.45465300 | -3.64157400 | -1.47506600 |
| H | -1.61215400 | 4.27840200  | -3.49360600 | H  | -8.43601300 | -4.07750700 | -1.31053300 |
| C | -0.18831200 | 2.66397200  | -3.26594200 | C  | -6.69521300 | -3.19278300 | -0.39613400 |
| H | 0.15943900  | 2.73679900  | -4.29367500 | H  | -7.08353400 | -3.26696800 | 0.61621600  |
| C | -3.90480400 | 3.90560000  | -1.09370000 | C  | -5.43814900 | -2.63069400 | -0.59493500 |
| C | -4.33780400 | 2.67970200  | -1.59989300 | H  | -4.85608500 | -2.26249700 | 0.24410600  |
| H | -3.62339800 | 1.97119600  | -2.00521000 | Ir | 0.76477800  | 0.14189200  | 0.03640200  |
| C | -5.69823200 | 2.37640500  | -1.58190400 | N  | 1.71352500  | -0.16118000 | -1.86373300 |
| H | -6.02713200 | 1.41880400  | -1.97789900 | N  | 2.22706300  | 1.53818900  | 0.76092600  |
| C | -6.62525000 | 3.27742000  | -1.06542700 | N  | 1.63174200  | -1.57470900 | 0.99261400  |
| H | -7.68371100 | 3.03345900  | -1.05741100 | O  | -2.59750000 | 4.30595000  | -1.07973600 |
| C | -6.17842400 | 4.49873300  | -0.55999900 | O  | -2.81821400 | 0.13975500  | 4.21127800  |
| H | -6.88916600 | 5.21262800  | -0.15172300 | O  | -3.73641000 | -1.92493500 | -2.16704300 |
| C | -4.82670700 | 4.81628300  | -0.57174900 | C  | 5.50101600  | 3.17193400  | -0.21961500 |
| H | -4.46131700 | 5.76177400  | -0.18251800 | C  | 6.30214200  | 1.89710800  | -0.53323700 |
| C | 3.32962400  | 1.91620900  | 0.10875800  | C  | 5.05113800  | 3.82848800  | -1.53546800 |
| H | 3.45222600  | 1.46899500  | -0.87275500 | C  | 6.41878600  | 4.14842000  | 0.52037200  |
| C | 4.27244300  | 2.81056500  | 0.61178600  | H  | 6.63852100  | 1.40812900  | 0.38848400  |
| C | 3.99848500  | 3.32507800  | 1.88354700  | H  | 5.70877900  | 1.17244200  | -1.10195400 |
| H | 4.67948100  | 4.02931300  | 2.35110500  | H  | 7.18845500  | 2.14286000  | -1.13073100 |
| C | 2.85049100  | 2.94998400  | 2.56356300  | H  | 4.48119600  | 4.74384600  | -1.34177600 |
| H | 2.64637400  | 3.36496400  | 3.54458000  | H  | 5.92364800  | 4.09148200  | -2.14584200 |
| C | 1.95082800  | 2.04480600  | 1.99032600  | H  | 4.41682300  | 3.16042700  | -2.12809800 |
| C | 0.70840100  | 1.56836800  | 2.58354300  | H  | 7.28782200  | 4.38189000  | -0.10465400 |
| C | -0.05629600 | 0.65974000  | 1.79849700  | H  | 5.91116300  | 5.09367100  | 0.74464900  |
| C | -1.26279700 | 0.20405900  | 2.34673600  | H  | 6.79168600  | 3.72508100  | 1.46046300  |
| H | -1.88042800 | -0.49329200 | 1.78889500  | C  | 4.63163000  | -2.60745600 | 3.06237000  |
| C | -1.68529600 | 0.62400600  | 3.60632400  | C  | 5.74377900  | -2.17411700 | 2.09224800  |
| C | -0.92179500 | 1.50969200  | 4.37065600  | C  | 4.50152800  | -1.56705700 | 4.18702000  |
| H | -1.28001300 | 1.81159400  | 5.34939500  | C  | 5.03078800  | -3.94707400 | 3.68634500  |
| C | 0.27227700  | 1.97593700  | 3.85187500  | H  | 5.85895400  | -2.89877400 | 1.27768000  |
| H | 0.86149700  | 2.67065400  | 4.44579400  | H  | 5.53624300  | -1.19502600 | 1.64584700  |
| C | -3.97346200 | -0.06553200 | 3.50371700  | H  | 6.70222700  | -2.10197400 | 2.62069200  |
| C | -4.37296600 | 0.74744800  | 2.44260900  | H  | 3.71725700  | -1.85359500 | 4.89618000  |
| H | -3.72786600 | 1.54768100  | 2.09435600  | H  | 5.44701500  | -1.48382900 | 4.73672900  |
| C | -5.60679600 | 0.52315300  | 1.83925700  | H  | 4.25234900  | -0.57394200 | 3.79788500  |
| H | -5.91226200 | 1.16052200  | 1.01389800  | H  | 5.98030500  | -3.83453800 | 4.22122600  |
| C | -6.44431500 | -0.49558900 | 2.29017600  | H  | 4.28446500  | -4.29716600 | 4.40880000  |
| H | -7.40682100 | -0.66085000 | 1.81449100  | H  | 5.16956300  | -4.72638200 | 2.92774200  |
| C | -6.03572000 | -1.29909100 | 3.35302800  | C  | 4.22768800  | -2.40883800 | -3.58902900 |
| H | -6.68038500 | -2.09532300 | 3.71699500  | C  | 5.38882500  | -2.26385500 | -2.59104400 |
| C | -4.80133700 | -1.09041600 | 3.95948600  | C  | 3.52390900  | -3.75706300 | -3.36121600 |
| H | -4.46484200 | -1.70280300 | 4.79049200  | C  | 4.80560500  | -2.39732400 | -5.00657600 |
| C | 2.77783400  | -1.58292600 | 1.67804000  | H  | 5.91192400  | -1.31079100 | -2.73219600 |
| H | 3.28743700  | -0.62502800 | 1.71767900  | H  | 5.04227500  | -2.30770000 | -1.55247600 |
| C | 3.30894200  | -2.70795800 | 2.30610000  | H  | 6.11488800  | -3.07352600 | -2.73329200 |
| C | 2.55236000  | -3.87907300 | 2.18815700  | H  | 2.69259700  | -3.88805100 | -4.06258800 |
| H | 2.89024100  | -4.80156100 | 2.64983900  | H  | 4.23025200  | -4.58290500 | -3.50937600 |
| C | 1.35774400  | -3.87944500 | 1.48551400  | H  | 3.11979000  | -3.83976200 | -2.34657700 |
| H | 0.77834900  | -4.79323700 | 1.40925600  | H  | 5.51646900  | -3.22314600 | -5.12010500 |
| C | 0.89184200  | -2.70799400 | 0.87953300  | H  | 4.02524800  | -2.52766600 | -5.76520900 |
| C | -0.33637500 | -2.56191100 | 0.10910700  | H  | 5.34390600  | -1.46642700 | -5.22053100 |

Table S13 Cartesian coordinates for the optimized structures of **5** in the ground state

|   |             |             |             |   |             |             |             |
|---|-------------|-------------|-------------|---|-------------|-------------|-------------|
| C | 1.60357100  | -1.61738000 | -1.57592300 | O | -4.06866800 | 3.31284500  | -2.70217500 |
| H | 1.83802300  | -1.92386100 | -0.56088800 | O | -4.52862300 | 1.15407400  | 3.57538200  |
| C | 2.31542400  | -2.12369200 | -2.66140700 | O | -4.65666900 | -3.07157900 | -1.47152900 |
| C | 1.91220000  | -1.65708400 | -3.91790800 | C | 3.90610500  | 3.39035900  | -1.09556300 |
| H | 2.41058200  | -2.00159500 | -4.81876400 | C | 4.86958200  | 2.21544200  | -0.85840700 |
| C | 0.86898700  | -0.75294800 | -4.03348400 | C | 3.52664000  | 3.44579200  | -2.58477900 |
| H | 0.56343000  | -0.40555800 | -5.01456400 | C | 4.63060000  | 4.68891500  | -0.73241300 |
| C | 0.20300800  | -0.28719700 | -2.89307300 | H | 5.16012700  | 2.15274800  | 0.19686400  |
| C | -0.90024900 | 0.65849300  | -2.86350100 | H | 4.42047000  | 1.25703300  | -1.14183100 |
| C | -1.42373200 | 0.97411300  | -1.58096500 | H | 5.78111000  | 2.34485200  | -1.45465900 |
| C | -2.49839000 | 1.87412000  | -1.52762000 | H | 2.84093500  | 4.27690800  | -2.78296300 |
| H | -2.91609500 | 2.12309500  | -0.55857600 | H | 4.42363200  | 3.58766600  | -3.20007200 |
| C | -3.03188900 | 2.43857500  | -2.68611300 | H | 3.03630200  | 2.52385800  | -2.91534700 |
| C | -2.50120800 | 2.11723000  | -3.94597400 | H | 5.52703100  | 4.79534100  | -1.35330600 |
| H | -2.93615200 | 2.57131200  | -4.83066000 | H | 4.00064300  | 5.56844200  | -0.90854500 |
| C | -1.44509500 | 1.23393200  | -4.02381700 | H | 4.95132500  | 4.69801700  | 0.31601200  |
| H | -1.04381700 | 0.98876100  | -5.00471000 | C | 3.42456000  | -1.01992000 | 3.83553800  |
| C | 1.85074600  | 2.06404200  | -0.44990900 | C | 4.51820800  | -0.67416000 | 2.81093100  |
| H | 2.11176700  | 1.31261300  | -1.18867800 | C | 3.05649300  | 0.24178600  | 4.63394600  |
| C | 2.64458000  | 3.19313300  | -0.25773500 | C | 3.98608700  | -2.06124600 | 4.80652500  |
| C | 2.19541300  | 4.08709700  | 0.72093100  | H | 4.80214600  | -1.55681700 | 2.22584200  |
| H | 2.75260500  | 4.99367800  | 0.93624400  | H | 4.19139200  | 0.10296400  | 2.11102800  |
| C | 1.02999300  | 3.83409400  | 1.42650700  | H | 5.41469000  | -0.30400700 | 3.32323100  |
| H | 0.69132300  | 4.54023200  | 2.17716000  | H | 2.28522000  | 0.02060800  | 5.37996200  |
| C | 0.28396100  | 2.67708200  | 1.17304200  | H | 3.93863500  | 0.62987800  | 5.15773000  |
| C | -0.95695800 | 2.28880900  | 1.82370900  | H | 2.67425500  | 1.03746200  | 3.98546500  |
| C | -1.53764200 | 1.06666800  | 1.38945900  | H | 4.87488600  | -1.65824600 | 5.30453300  |
| C | -2.74933700 | 0.68240700  | 1.98440000  | H | 3.26094600  | -2.32230600 | 5.58588300  |
| H | -3.21351200 | -0.24217700 | 1.65950500  | H | 4.28459700  | -2.98101700 | 4.28981500  |
| C | -3.35847700 | 1.46665400  | 2.96391300  | C | 3.45036100  | -3.11934300 | -2.43297800 |
| C | -2.76937900 | 2.67056700  | 3.38318300  | C | 4.53600500  | -2.46750400 | -1.56010500 |
| H | -3.26528000 | 3.25981100  | 4.14805300  | C | 2.90348500  | -4.36623100 | -1.71828000 |
| C | -1.57885200 | 3.06980000  | 2.81223600  | C | 4.09166300  | -3.56079500 | -3.75100400 |
| H | -1.13246800 | 4.00594400  | 3.14044500  | H | 4.94862300  | -1.57596500 | -2.04671600 |
| C | 1.54813100  | -0.73590400 | 2.16101000  | H | 4.14413800  | -2.16651700 | -0.58206800 |
| H | 1.91579800  | 0.25851300  | 1.92681900  | H | 5.35875800  | -3.17202800 | -1.38691400 |
| C | 2.18591600  | -1.53651500 | 3.10671500  | H | 2.12796800  | -4.85284800 | -2.32001600 |
| C | 1.61032400  | -2.79408400 | 3.32029800  | H | 3.70950500  | -5.09045500 | -1.54753100 |
| H | 2.04357900  | -3.48288500 | 4.03890300  | H | 2.46452000  | -4.11948400 | -0.74549700 |
| C | 0.47699900  | -3.17888000 | 2.62163800  | H | 4.89996200  | -4.27181400 | -3.54686700 |
| H | 0.03937600  | -4.15502100 | 2.80180600  | H | 3.36943300  | -4.06067400 | -4.40680200 |
| C | -0.10619400 | -2.31674600 | 1.68634300  | H | 4.52631200  | -2.71540200 | -4.29734200 |
| C | -1.29145600 | -2.58411700 | 0.88393100  | C | -5.42015900 | -4.25004700 | -1.41278600 |
| C | -1.68847100 | -1.55267100 | -0.01931800 | H | -6.23463200 | -4.11948800 | -2.12812800 |
| C | -2.83336400 | -1.78985500 | -0.78160200 | H | -4.83006000 | -5.13216600 | -1.69677800 |
| H | -3.19189300 | -1.04454700 | -1.48583700 | H | -5.84372200 | -4.41237200 | -0.41195300 |
| C | -3.56262200 | -2.97790700 | -0.67270200 | C | -4.64490300 | 3.66979100  | -1.46719000 |
| C | -3.16019700 | -3.98241100 | 0.21747300  | H | -5.06230100 | 2.79718500  | -0.94829400 |
| H | -3.71300300 | -4.91009600 | 0.31463300  | H | -3.91712000 | 4.15889100  | -0.80690300 |

|    |             |             |             |   |             |             |             |
|----|-------------|-------------|-------------|---|-------------|-------------|-------------|
| C  | -2.02455600 | -3.77021800 | 0.98591800  | H | -5.44911700 | 4.37012800  | -1.70184700 |
| H  | -1.71951300 | -4.55178300 | 1.67850400  | C | -5.16689400 | -0.04362800 | 3.19771900  |
| Ir | -0.51540500 | 0.07827000  | -0.02989500 | H | -5.43770500 | -0.04049400 | 2.13385500  |
| N  | 0.60256600  | -0.73908000 | -1.67477700 | H | -4.53611400 | -0.91918700 | 3.39885300  |
| N  | 0.73087900  | 1.80627600  | 0.23009000  | H | -6.07435100 | -0.10409300 | 3.80207800  |
| N  | 0.46320900  | -1.10191400 | 1.47375800  | O | -4.06866800 | 3.31284500  | -2.70217500 |

Table S14 Cartesian coordinates for the optimized structures of **6** in the ground state

|   |             |             |             |    |             |             |             |
|---|-------------|-------------|-------------|----|-------------|-------------|-------------|
| C | 1.38254600  | -1.42522000 | -1.71741700 | H  | -1.59538700 | -4.81357700 | 1.41232400  |
| H | 1.65778100  | -1.79369700 | -0.73397700 | Ir | -0.79829100 | 0.00153300  | -0.00619000 |
| C | 2.10232800  | -1.79659600 | -2.85095900 | N  | 0.32342300  | -0.61171200 | -1.73010700 |
| C | 1.64206600  | -1.26161500 | -4.05972500 | N  | 0.32501400  | 1.79931300  | 0.33599000  |
| H | 2.14294600  | -1.49925300 | -4.99308100 | N  | 0.30748500  | -1.19360800 | 1.39487500  |
| C | 0.53690600  | -0.42668700 | -4.08664900 | O  | -4.66427700 | 3.11791900  | -2.31293200 |
| H | 0.18677700  | -0.02730200 | -5.03241100 | O  | -4.74407400 | 0.48656400  | 3.75917100  |
| C | -0.13519400 | -0.09938200 | -2.90273900 | O  | -4.71544800 | -3.41004300 | -1.56246400 |
| C | -1.30567000 | 0.75419900  | -2.78100500 | C  | 3.33144300  | 3.70180100  | -0.96435500 |
| C | -1.81924400 | 0.93051400  | -1.46495100 | C  | 4.38246800  | 2.58565200  | -0.84203800 |
| C | -2.95626200 | 1.73360800  | -1.33303200 | C  | 2.89931700  | 3.83516400  | -2.43419300 |
| H | -3.38717000 | 1.89019900  | -0.34448100 | C  | 3.97477700  | 5.02053200  | -0.52768700 |
| C | -3.56078500 | 2.33736300  | -2.43520100 | H  | 4.71301000  | 2.46944400  | 0.19676700  |
| C | -3.04366100 | 2.15759000  | -3.72390700 | H  | 3.99172500  | 1.61963800  | -1.18109300 |
| H | -3.53194900 | 2.63694300  | -4.56616000 | H  | 5.26141000  | 2.82264500  | -1.45401300 |
| C | -1.92137700 | 1.36706600  | -3.88307500 | H  | 2.15392500  | 4.62926100  | -2.55241100 |
| H | -1.52580400 | 1.22536400  | -4.88638000 | H  | 3.76433000  | 4.08051900  | -3.06246200 |
| C | 1.39721700  | 2.18761300  | -0.35900200 | H  | 2.46062300  | 2.90712900  | -2.81628700 |
| H | 1.68439100  | 1.51524000  | -1.16167400 | H  | 4.83997700  | 5.23644100  | -1.16434000 |
| C | 2.11677200  | 3.35388200  | -0.10702600 | H  | 3.27881700  | 5.86235000  | -0.62004700 |
| C | 1.64316400  | 4.13882300  | 0.95031000  | H  | 4.32992800  | 4.97831200  | 0.50875200  |
| H | 2.14412900  | 5.06459600  | 1.21559500  | C  | 3.27973900  | -1.01597300 | 3.73686000  |
| C | 0.52459500  | 3.75171900  | 1.67073900  | C  | 4.34431400  | -0.55683100 | 2.72659200  |
| H | 0.16425200  | 4.37513100  | 2.48197700  | C  | 2.83009400  | 0.18537300  | 4.58512200  |
| C | -0.14696000 | 2.56474200  | 1.35508400  | C  | 3.91317500  | -2.05444700 | 4.66610700  |
| C | -1.33275800 | 2.04026300  | 2.01470100  | H  | 4.68699500  | -1.39513000 | 2.10886400  |
| C | -1.83997600 | 0.81007100  | 1.50766600  | H  | 3.96193700  | 0.22130200  | 2.05656100  |
| C | -2.99493500 | 0.30602500  | 2.11504600  | H  | 5.21387100  | -0.14467000 | 3.25296300  |
| H | -3.42284500 | -0.62833800 | 1.75198600  | H  | 2.07447800  | -0.11493200 | 5.31938100  |
| C | -3.62134900 | 0.97073500  | 3.16885400  | H  | 3.68504400  | 0.60819700  | 5.12684800  |
| C | -3.10917400 | 2.17779100  | 3.66001700  | H  | 2.39766600  | 0.98084000  | 3.96864500  |
| H | -3.61286100 | 2.67619600  | 4.48197900  | H  | 4.77025800  | -1.60988600 | 5.18400600  |
| C | -1.96942800 | 2.69971700  | 3.07703400  | H  | 3.20822700  | -2.39950100 | 5.43129400  |
| H | -1.57730100 | 3.64009000  | 3.45820700  | H  | 4.27813700  | -2.92819100 | 4.11338900  |
| C | 1.37117100  | -0.78577700 | 2.09162700  | C  | 3.30090300  | -2.73400100 | -2.72112200 |
| H | 1.66189000  | 0.24446500  | 1.91064500  | C  | 4.35306700  | -2.09877300 | -1.79650400 |

|   |             |             |             |   |             |             |             |
|---|-------------|-------------|-------------|---|-------------|-------------|-------------|
| C | 2.07670900  | -1.58567800 | 2.98837100  | C | 2.83979500  | -4.07349900 | -2.12298400 |
| C | 1.59893900  | -2.89249000 | 3.13668200  | C | 3.95480000  | -3.00930500 | -4.07763000 |
| H | 2.08967400  | -3.58428600 | 3.81423100  | H | 4.70518900  | -1.14255500 | -2.20089500 |
| C | 0.48945700  | -3.32281500 | 2.42660900  | H | 3.95479900  | -1.91366800 | -0.79255300 |
| H | 0.12695700  | -4.33673900 | 2.55829700  | H | 5.21933700  | -2.76367700 | -1.69324700 |
| C | -0.16862000 | -2.45689100 | 1.54583200  | H | 2.09160600  | -4.55132100 | -2.76499600 |
| C | -1.34491400 | -2.76566500 | 0.74616500  | H | 3.69167400  | -4.75718300 | -2.02201000 |
| C | -1.84297500 | -1.71303300 | -0.07788100 | H | 2.39405900  | -3.94467800 | -1.13076300 |
| C | -2.98513600 | -1.98639700 | -0.83711600 | H | 4.80897400  | -3.68244400 | -3.94427100 |
| H | -3.41481500 | -1.22508700 | -1.48140700 | H | 3.25935700  | -3.49245600 | -4.77361000 |
| C | -3.60896000 | -3.23283700 | -0.79395700 | H | 4.32782300  | -2.09017800 | -4.54459600 |
| C | -3.10675600 | -4.25765900 | 0.01831000  | H | -4.90639100 | 3.14824800  | -1.37648300 |
| H | -3.59679700 | -5.22959800 | 0.04748000  | H | -5.03246400 | -4.31538900 | -1.44169900 |
| C | -1.97758000 | -4.01440700 | 0.78123200  | H | -4.97518600 | -0.34591200 | 3.32348500  |
